# Supplementary material for: Diazopyridine–Ni(ii) complexes exhibiting intra-chain ferromagnetic interaction after irradiation: formation of magnetic gel
Source: Royal Society of Chemistry journal article supplement (doi:10.1039/c5qi00109a), 2015-01-01
Supplement: c5qi00109a1.pdf [file c5qi00109a1.pdf]

## Supporting Information

### Diazopyridine-Ni(II) Complexes Exhibiting Intra-Chain Ferromagnetic Interaction After Irradiation: Formation of Magnetic Gel

Koya Mori,<sup>1</sup>Rumi Eguchi,<sup>1</sup> Satoru Karasawa,<sup>1,2,\*</sup> and Noboru Koga<sup>1,\*</sup>

<sup>1</sup>.Graduate School of Pharmaceutical Sciences, Kyushu University, 3-1-1 Maidashi, Higashi-ku, Fukuoka, 812-8582 Japan

<sup>2</sup>.PRESTO, Japan Science and Technology Agency, Kawaguchi, 332-0012 Japan

\*Corresponding authors

Tel ; +81-92-642-6593. Fax +81-92-642-6545

E-mail: karasawa@fc.phar.kyushu-u.ac.jp and koga@fc.phar.kyushu-u.ac.jp

## Contents

S1. Figure S1. Table 1. Crystallographic data collection and structural refinement information for **3**.

S2. Figure S1. Molecular structures of **3**.

Figure S1'. The chain structure of  $[\text{Co}(\text{Br-hfpip})_2\text{D1py}_2]_n$

S3. Figure S2. Strain dependence of  $G'$  and  $G''$  for the gel of **2** (entry 16 in Table 2).

S4. Figure S3. Absorption spectrum of **1** in 15 mM MTHF solution.

S5. Figure S4. SEM image of **1** and counts vs width plot of the fibers in xerogel.

S6. Figure S5.  $M$  vs *Irradiation* plots of **1**.

S7. Figure S6.  $\ln(\chi_{\text{mol}}T)$  vs  $T$  plot of the gel sample of **1** after irradiation. The solid line is the fitting the data from 50 – 15 K.

Table 1. Crystallographic data collection and structural refinement information for **3**.

| <b>3</b>                                                                 |                                                                                  |
|--------------------------------------------------------------------------|----------------------------------------------------------------------------------|
| empirical formula                                                        | C <sub>52</sub> H <sub>62</sub> F <sub>12</sub> N <sub>6</sub> O <sub>4</sub> Ni |
| formula weight                                                           | 1121.78                                                                          |
| crystal system                                                           | Monoclinic                                                                       |
| space group                                                              | <i>P</i> 2 <sub>1</sub> /c (no. 14)                                              |
| <i>a</i> / Å                                                             | 11.0039(6)                                                                       |
| <i>b</i> / Å                                                             | 45.083(3)                                                                        |
| <i>c</i> / Å                                                             | 11.3568(4)                                                                       |
| $\beta$ / °                                                              | 105.098(4)                                                                       |
| <i>V</i> / Å <sup>3</sup>                                                | 5439.5(5)                                                                        |
| $\mu$ / cm <sup>-1</sup>                                                 | 1.303                                                                            |
| <i>Z</i> ( <i>Z'</i> )                                                   | 4 (1)                                                                            |
| crystal size / mm                                                        | 0.80 x 0.80 x 0.3                                                                |
| <i>D</i> <sub>calc</sub> / gcm <sup>-3</sup>                             | 1.370                                                                            |
| <i>F</i> (000)                                                           | 2336.00                                                                          |
| radiation                                                                | CuK $\alpha$                                                                     |
| <i>T</i> / K                                                             | 123                                                                              |
| no. reflections                                                          | 52833                                                                            |
| measured                                                                 |                                                                                  |
| no. unique                                                               | 9928                                                                             |
| reflections                                                              |                                                                                  |
| no. parameters                                                           | 677                                                                              |
| <i>R</i> <sub>1</sub> ( <i>I</i> > 2 $\sigma$ ( <i>I</i> )) <sup>a</sup> | 0.0762                                                                           |
| <i>wR</i> <sub>2</sub> (all data) <sup>a</sup>                           | 0.1895                                                                           |
| GOF                                                                      | 1.022                                                                            |

$$^a R_1 = \Sigma ||F_0| - |F_c|| / \Sigma |F_0|; wR_2 = \{\Sigma w(F_0^2 - F_c^2)^2 / \Sigma w(F_0^2)^2\}^{1/2}$$

S2.

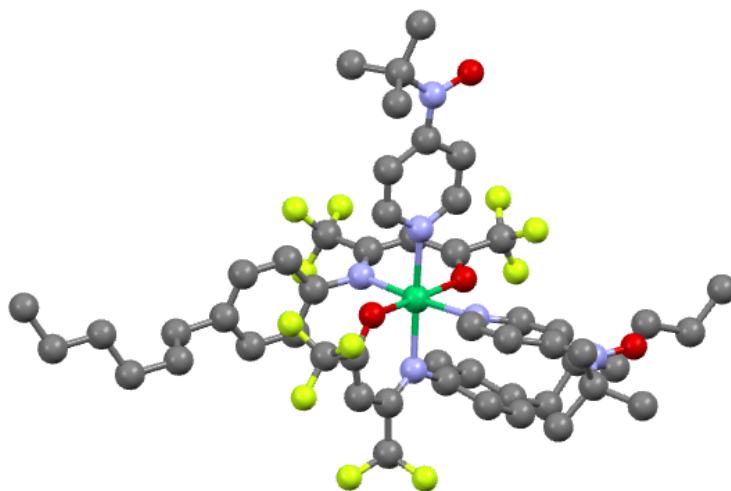

Figure S1. Molecular structures of **3**. Hydrogen atoms are omitted for sake of clarity. Color code; Ni (green), N (blue), O (red), F (yellow), and C (gray), respectively.

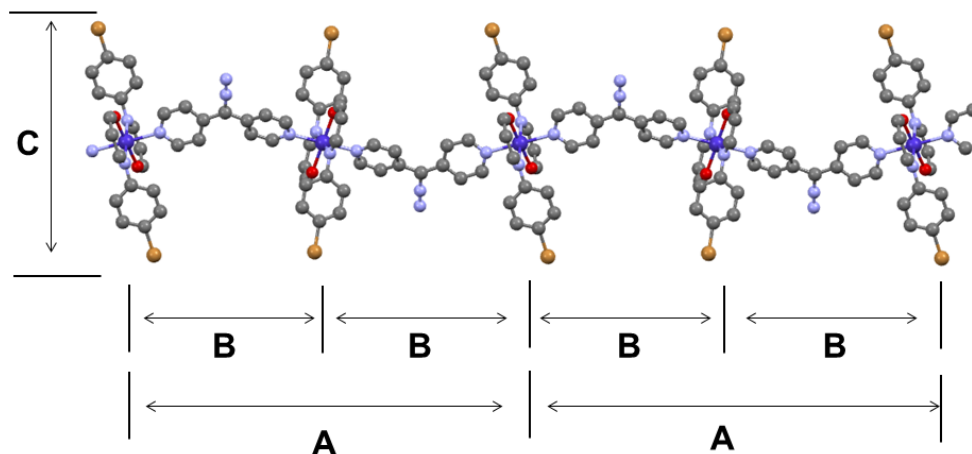

Figure S1'. The chain structure of  $[\text{Co}(\text{Br-hfpip})_2\text{D1py}_2]_n$  reported previously.<sup>[1]</sup> Capital letters of A, B, and C, represent the distances of one pitch (A), one unit (B), and the width of the chain, respectively.  $\text{CF}_3$  groups and H atoms are omitted for a sake of clarity.

[1] S. Karasawa, N. Koga *Inorg. Chem.* **2011**, *50*, 2055.

S3.

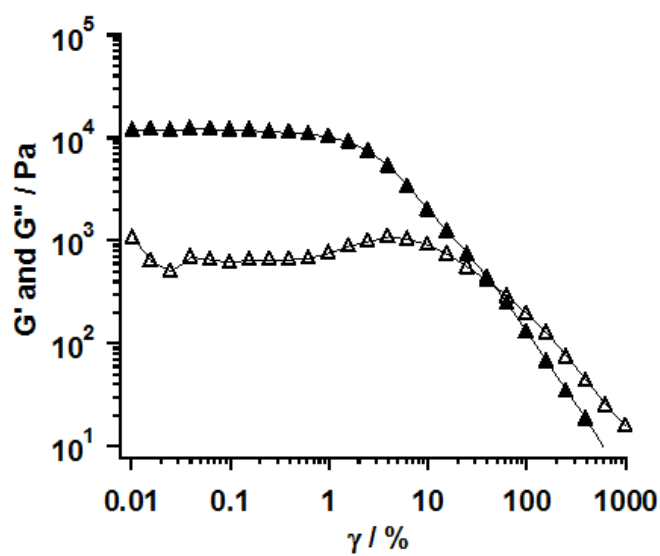

Figure S2. Strain dependence of  $G'$  and  $G''$  for the gel of **2** (entry 16 in Table 2).

S4.

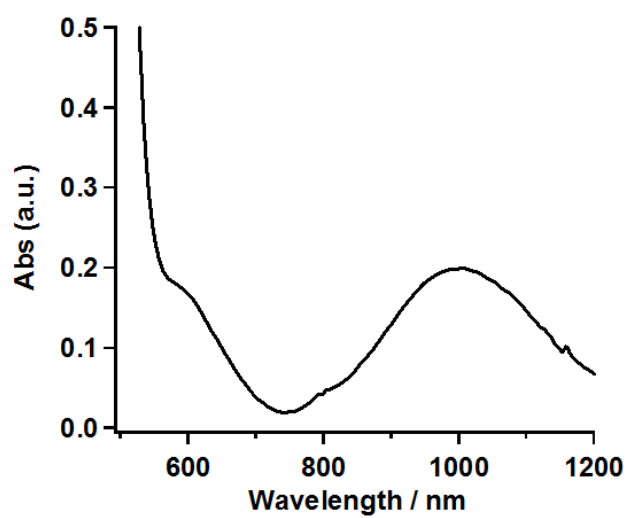

Figure S3. Absorption spectrum of **1** in 15 mM MTHF solution sample.

S5.

(a)

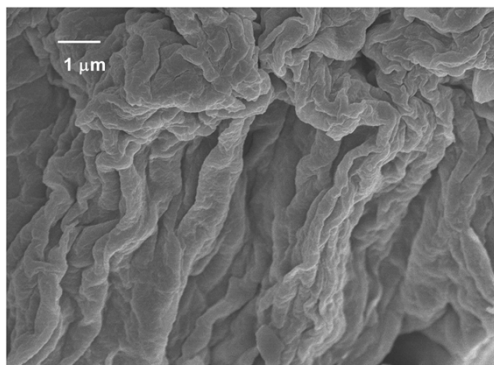

(b)

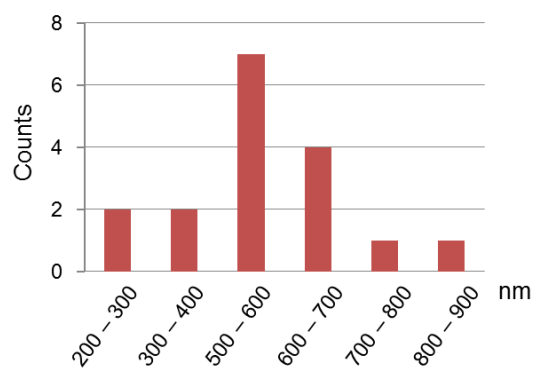

Figure S4. (a) SEM image of xerogel for **1**. (b) Counts vs width plot of the fiber in left image.

S6.

(a)

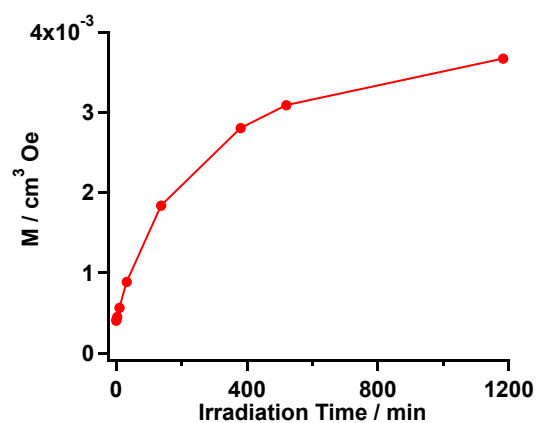

(b)

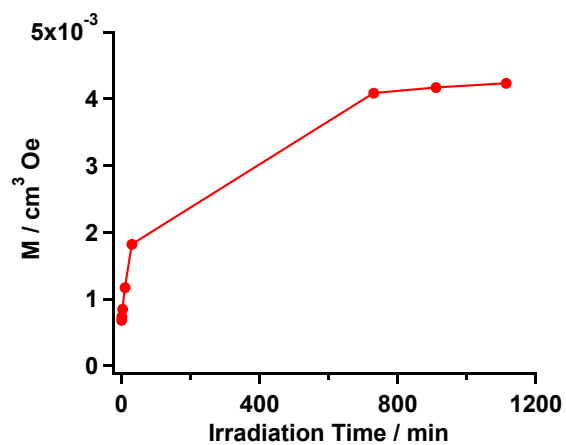

(c)

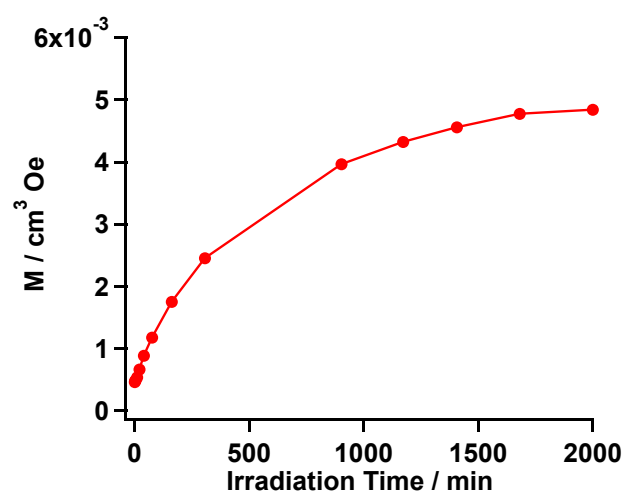

Figure S5.  $M$  vs Irradiation plots of **1**. Samples of the powder (a), 15 mM MTHF solution (b), and the gel (c).

S7.

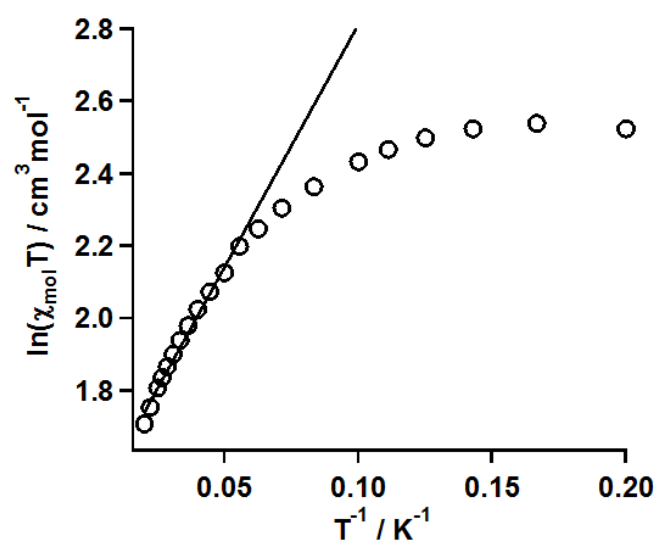

Figure S6.  $\ln(\chi_{\text{mol}} T)$  vs  $T$  plot of the gel sample of **1** after irradiation. The solid line is the fitting the data from 50 – 15 K.
